# Supplementary material
Source: publisher figshare collection journal article supplement (https://gsajournals.figshare.com/ndownloader/files/21938178)
Supplement: Supplementary file 1 [file 21938178]

Supplemental Material

**Data from female crosses used for viability corrected *k* values in Tables 3, 7 and 8**

_______________________________________________________________________

|  | ***k W*** | | ***n*** | ***k*** | ***W*** | ***n*** | *n* |
| --- | --- | --- | --- | --- | --- | --- | --- |
| **Table 3** |  |  |  |  |  |  |
| *SD-Madlt73/ lt pk cn bw* | 0.522+0.021 | 0.874 | 1096 | 0.509+0.012 | 0.982 | 1996 |
|  |  |  |  |  |  |  |
| *SD-5R2/Cy ReR cn-5* | 0.492+0.019 | 1.023 | 2377 | 0.535+0.012 | 0.866 | 2929 |
|  |  |  |  |  |  |  |
| *SD-MadR77/ lt pk cn bw* | 0.496+0.011 | 1.018 | 2044 | 0.486+0.021 | 1.112 | 1964 |
|  |  |  |  |  |  |  |
| **Table 7**  *SD-MadR77/M(SD)-5 cn* | 0.512+0.019 | 0.979 | 1320 | 0.520+.0.021 | 0.937 | 246 |
|  |  |  |  |  |  |  |
| *SD-5R2/M(SD)-5 cn* | 0.491+0.013 | 1.046 | 2467 | 0.478+0.009 | 1.092 | 2402 |
|  |  |  |  |  |  |  |
| *SD-5R7/M(SD)-5 cn* | 0.485+0.010 | 1.061 | 2792 | 0.473+0.010 | 1.104 | 2136 |
|  |  |  |  |  |  |  |
| *R(Cy)40, bw /M(SD)-5 cn* | 0.463+0.010 | 1.174 | 1846 | 0.480+0.010 | 1.072 | 3705 |
|  |  |  |  |  |  |  |
| *SD-RomaR57bw /M(SD)-5 cn* | 0.472+0.015 | 1.155 | 1851 | 0.472+0.018 | 1.158 | 876 |
|  |  |  |  |  |  |  |
| **Table 8** |  | |  |  |  |  |
| *SD-Mad/ al2* | 0.462+0.009 | 1.143 | 2143 |  |  |  |
|  |  |  |  |  |  |  |
| *al2 /Sd Rspssbw* | 0.495+0.023 | 1.081 | 691 |  |  |  |
|  |  |  |  |  |  |  |
| *SD-Mad / Dp(1;2)eagx6der* | 0.504+0.012 | 0.992 | 2231 |  |  |  |
|  |  |  |  |  |  |  |
| *Dp(1;2)eagx6der/Sd Rspssbw* | 0.486+0.014 | 1.030 | 1632 |  |  |  |

_______________________________________________________________________

*k* values(+ 2 S.E.) for crosses of heterozygous females reciprocal to the corresponding crosses for males in the Tables cited. *W* is the value used for the viability correction as described in MATERIALS AND METHODS, where *W* = number of *SD+* progeny / number of *SD* progeny from females. n = total number of flies. In Tables 3, 7 and 8 the corrected *k* for each *SD/ SD*+ male is computed as *kc* = number of *SD* progeny / [number of *SD* progeny + (number of *SD+* progeny /***W****)*]*.*
